# Supplementary material for: Effects of the COVID-19 Epidemic on Hospital Admissions for Non-Communicable Diseases in a Large Italian University-Hospital: A Descriptive Case-Series Study
Source: J Clin Med. 2021 Feb 21;10(4):880. doi: 10.3390/jcm10040880 (PMC7924591; doi:10.3390/jcm10040880)
Supplement: Supplementary file 1 [file jcm-10-00880-s001.pdf]

**Table S1.** Admissions to ICU and in-hospital mortality for individual NCDs

|                                               | <b>Year 2019</b><br><b>(n = 8656)</b> | <b>Year 2020</b><br><b>(n = 7938)</b> | <b>Covid 2020</b><br><b>(n = 4160)</b> | <b>non-Covid 2020</b><br><b>(n = 3778)</b> |
|-----------------------------------------------|---------------------------------------|---------------------------------------|----------------------------------------|--------------------------------------------|
| <b>Access to ICU at least once</b>            |                                       |                                       |                                        |                                            |
| <b>Comorbidities</b>                          |                                       |                                       |                                        |                                            |
| Acute NCDs                                    |                                       |                                       |                                        |                                            |
| Acute Myocardial Infarction                   | 162/230<br>(70.4%)                    | 101/152<br>(66.4%)                    | 48/73<br>(65.7%)                       | 53/79<br>(67.0%)                           |
| Cerebrovascular Disease<br>(Stroke, TIA)      | 72/566<br>(12.7%)                     | 24/331<br>(7.2%)                      | 13/178<br>(7.3%)                       | 11/153<br>(7.1%)                           |
| Chronic NCDs                                  |                                       |                                       |                                        |                                            |
| Hypertension                                  | 219/1420<br>(15.4%)                   | 127/1360<br>(9.3%)                    | 76/993<br>(7.7%)                       | 51/367<br>(13.8%)                          |
| Dementia                                      | 4/409<br>(1%)                         | 1/328<br>(0.3%)                       | 1/253<br>(0.4%)                        | 0/75<br>(0%)                               |
| Chronic Respiratory Disease<br>(COPD, Asthma) | 47/418<br>(11.2%)                     | 25/334<br>(7.5%)                      | 15/246<br>(6.1%)                       | 10/88<br>(11.3%)                           |
| Diabetes                                      | 84/751<br>(11.1%)                     | 63/684<br>(9.2%)                      | 38/495<br>(7.7%)                       | 25/189<br>(13.2%)                          |
| Cancer                                        | 63/1152<br>(5.5%)                     | 57/784<br>(7.3%)                      | 29/326<br>(8.9%)                       | 28/458<br>(6.1%)                           |
| <b>Deaths</b>                                 |                                       |                                       |                                        |                                            |
| <b>Comorbidities</b>                          |                                       |                                       |                                        |                                            |
| Acute NCDs                                    |                                       |                                       |                                        |                                            |
| Acute Myocardial Infarction                   | 12/230<br>(5.2%)                      | 19/152<br>(12.5%)                     | 11/73<br>(15.0%)                       | 8/79<br>(10.1%)                            |
| Cerebrovascular Disease<br>(Stroke, TIA)      | 64/566<br>(11.3%)                     | 83/331<br>(25.0%)                     | 62/178<br>(34.8%)                      | 21/153<br>(13.7%)                          |
| Chronic NCDs                                  |                                       |                                       |                                        |                                            |
| Hypertension                                  | 63/1420<br>(4.4%)                     | 330/1360<br>(24.2%)                   | 288/993<br>(29.0%)                     | 42/367<br>(11.4%)                          |
| Dementia                                      | 46/409<br>(11.2%)                     | 98/328<br>(29.8%)                     | 82/253<br>(32.4%)                      | 16/75<br>(21.3%)                           |
| Chronic Respiratory Disease<br>(COPD, Asthma) | 33/418<br>(7.9%)                      | 94/334<br>(28.1%)                     | 84/246<br>(34.1%)                      | 10/88<br>(11.3%)                           |
| Diabetes                                      | 47/751<br>(6.3%)                      | 181/684<br>(26.4%)                    | 162/495<br>(32.7%)                     | 19/189<br>(10%)                            |
| Cancer                                        | 96/1152<br>(8.3%)                     | 80/784<br>(10.2%)                     | 54/326<br>(16.5%)                      | 26/458<br>(5.7%)                           |
